# Supplementary material
Source: PubMed Central journal article supplement (PMC1895753)

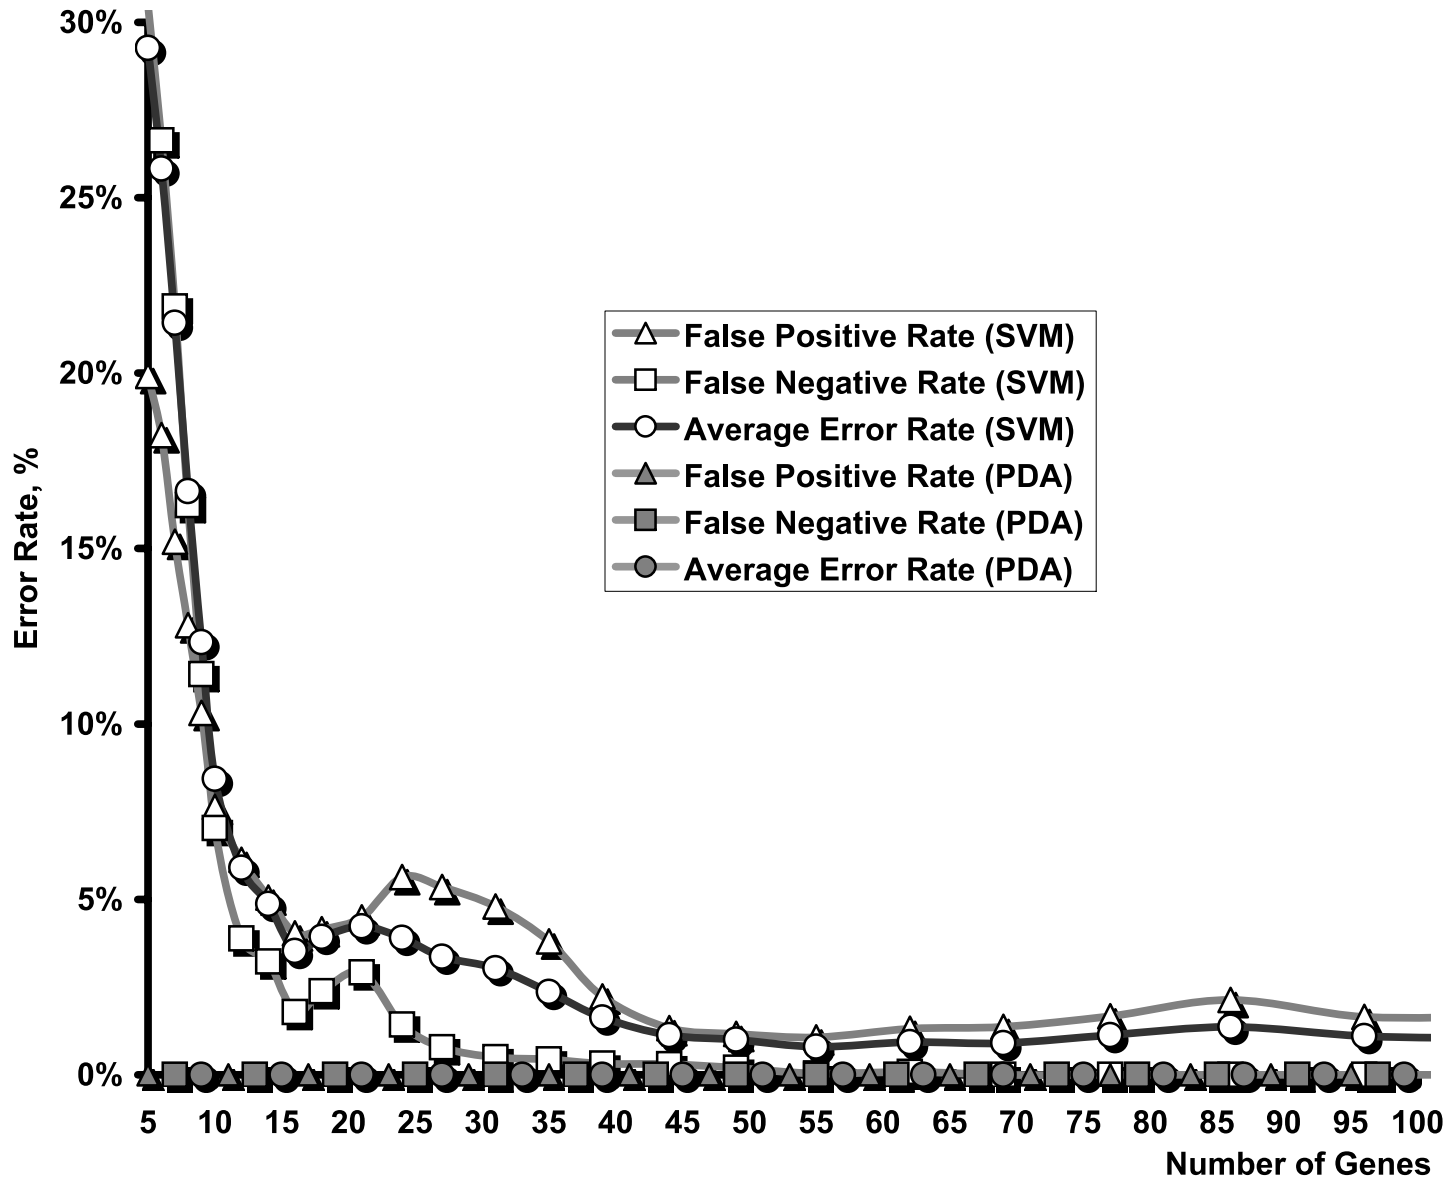

Supplement: blood_2005-07-2813_1.pdf [file blood_2005-07-2813_1.pdf]
